# Supplementary material for: Lysyl Oxidase in Ectopic Cardiovascular Calcification: Role of Oxidative Stress
Source: MDPI journal article supplement (doi:10.3390/antiox13050523), 2024-04-26
Supplement: s1 [file s1]

## SUPPLEMENTAL MATERIAL

### **Lysyl oxidase in ectopic cardiovascular calcification: role of oxidative stress**

Carme Ballester-Servera,<sup>1,2,3</sup> Judith Alonso,<sup>1,2,3</sup> Laia Cañes,<sup>1,3</sup> Paula Vázquez-Sufuentes,<sup>1,3</sup>  
Ana B. García-Redondo<sup>2,4</sup>, Cristina Rodríguez,<sup>2,3†</sup> José Martínez-González<sup>1,2,3†</sup>

<sup>1</sup>Instituto de Investigaciones Biomédicas de Barcelona-Consejo Superior de Investigaciones Científicas (IIBB-CSIC), Barcelona, Spain.

<sup>2</sup>CIBER de Enfermedades Cardiovasculares, Instituto de Salud Carlos III, Madrid, Spain.

<sup>3</sup>Institut de Recerca Sant Pau (IR SANT PAU), Barcelona, España;.

<sup>4</sup>Instituto de Investigación Hospital La Paz, Universidad Autónoma de Madrid, 28029 Madrid, Spain.

† These authors contributed equally to this work

**Address for correspondence:** Correspondence should be addressed to J.M.-G. IIBB, Rosselló, 161, 08036 Barcelona, Spain (email: [jose.martinez@iibb.csic.es](mailto:jose.martinez@iibb.csic.es); phone: +34 93 5565896) or C.R. IRHSCSP, C/Antoni M<sup>a</sup> Claret, 08025 Barcelona, Spain (email: [crodriguezs@santpau.cat](mailto:crodriguezs@santpau.cat); phone: +34 93 5565897).

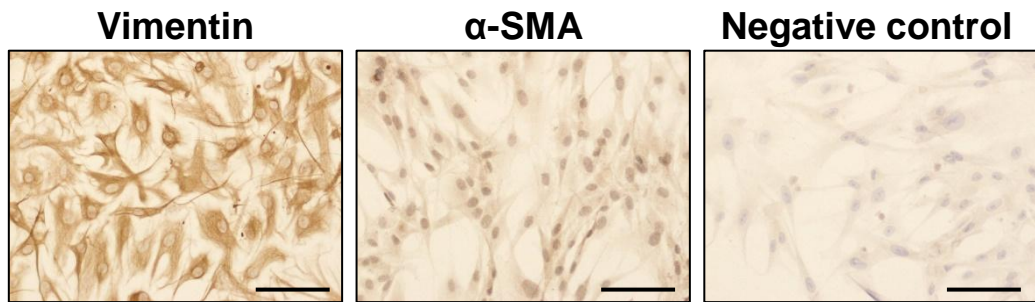

**Figure S1. Immunohistochemical staining for VICs markers.** Representative images showing immunostainings for vimentin (left panel) and  $\alpha$  smooth muscle cell ( $\alpha$ -SMA; middle panel) in primary cultures of valvular interstitial cells (VICs) from human aortic valves. Negative control in which primary antibody was omitted is shown (right panel). Bars: 100  $\mu$ m.

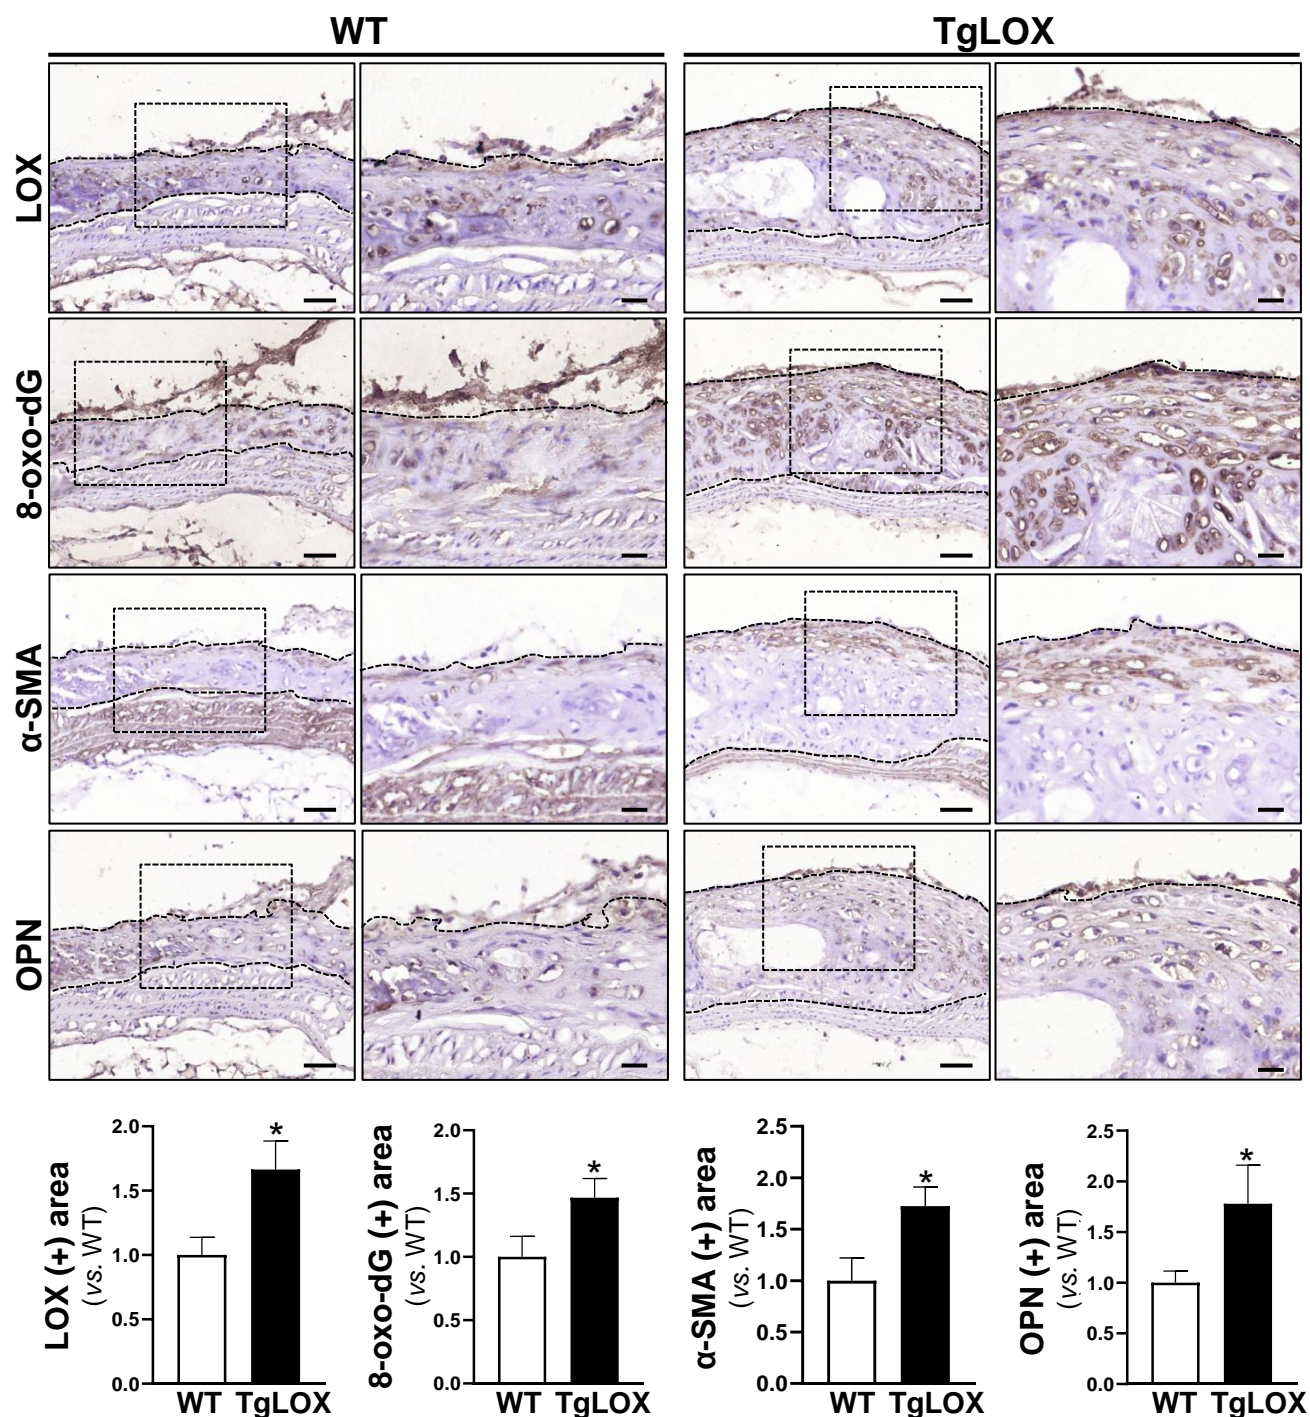

**Figure S2. LOX transgenesis enhances oxidative stress and the expression of osteogenic markers in atherosclerotic lesions of the aortic arch.** Wil-type (WT) and transgenic mice that overexpress LOX in vascular smooth muscle cells (TgLOX<sup>VSMC</sup>) were subjected to a single tail vein injection of adeno-associated virus (AAV) vector encoding for a gain-of-function mutated form of human PCSK9 (AAV-PCSK9<sup>D374Y</sup>) combined with a high fat/high cholesterol (HF/HC) diet during 20 weeks. Immunostaining for LOX, 8-oxo-2'-deoxyguanosine (8-oxo-dG),  $\alpha$ -smooth muscle actin ( $\alpha$ -SMA) and osteopontin (OPN) in the aortic arch are shown. Lesion areas are indicated with dotted lines and boxed areas are magnified in right panels. Bars: 50  $\mu$ m (left panels) and 20  $\mu$ m (magnified panels). Bar graphs show the quantitative analysis of immunostainings of intimal lesions indicated by a dotted line. Results are mean $\pm$ SEM. \* $P < 0.05$  vs. PCSK9<sup>D374Y</sup>-transduced WT mice (n = 5-7).

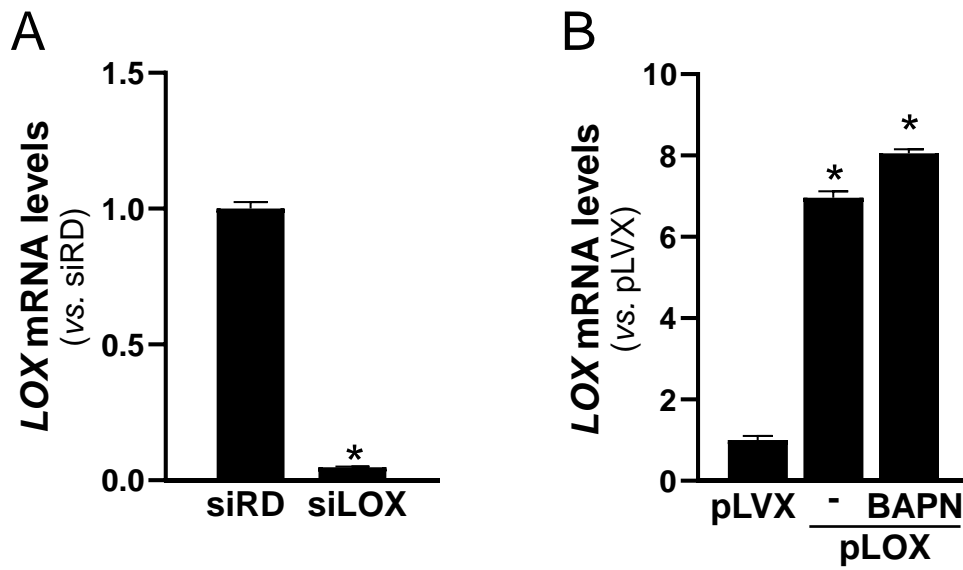

**Figure S3. Efficient LOX knockdown and lentiviral LOX overexpression in human valvular interstitial cells (VICs).** (A) Human VICs were transfected with a siRNA against LOX (siLOX) or a Random siRNA (siRD). LOX mRNA levels were assessed by real-time PCR. Data are mean $\pm$ SEM (n= 6).  $P<0.001$ : \*vs. siRD-transfected cells. (B) Human VICs were transduced with pLVX (empty vector) or pLVX-LOX (pLOX) lentivirus in the presence or absence of 0.5 mM BAPN ( $\beta$ -aminopropionitrile; inhibitor of LOX activity). LOX over-expression was verified by real-time PCR. Data are mean $\pm$ SEM (n= 4).  $P< 0.001$ : \*vs. pLVX.
